# Supplementary material
Source: publisher figshare collection journal article supplement (https://acs.figshare.com/ndownloader/files/3802759)
Supplement: Supplementary file 1 [file 3802759]

## Supporting Information

# Nucleation and Crystal Growth of Organic-Inorganic Lead Halide Perovskites under Different Relative Humidity

Hao Gao,<sup>1,2</sup> Chunxiong Bao,<sup>1</sup> Faming Li,<sup>1</sup> Tao Yu,<sup>\*1,3,4</sup> Jie Yang,<sup>1</sup> Weidong Zhu,<sup>1</sup> Xiaoxin Zhou,<sup>1</sup> Gao Fu<sup>1</sup> and Zhigang Zou<sup>1,3,4</sup>

1. Department of Physics, National Laboratory of Solid State Microstructures & Ecomaterials and Renewable Energy Research Center (ERERC), Nanjing University, Nanjing 210093, P. R. China

2. School of Mechanical and Electronic Engineering, Jingdezhen Ceramic Institute, Jingdezhen 333001, P. R. China.

3. Collaborative Innovation Center of Advanced Microstructures, Nanjing University, Nanjing 210093, P. R. China

4. Jiangsu Key Laboratory for Nano Technology, Nanjing 210093, P. R. China

*\*Corresponding author: yutao@nju.edu.cn*

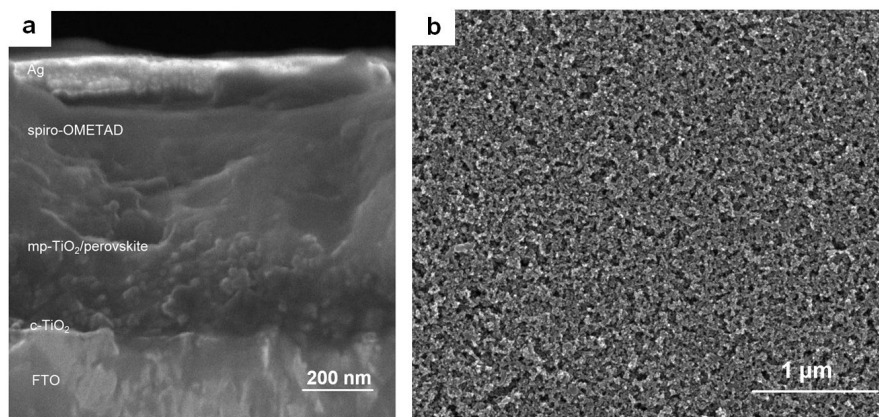

Figure S1. (a) SEM cross-sectional image of  $\text{CH}_3\text{NH}_3\text{PbI}_{3-x}\text{Cl}_x$  device. The layers from the bottom are: FTO, c-TiO<sub>2</sub>, mp-TiO<sub>2</sub>/perovskite, spiro-OMETAD, Ag. (b) SEM image of mp-TiO<sub>2</sub> substrate.

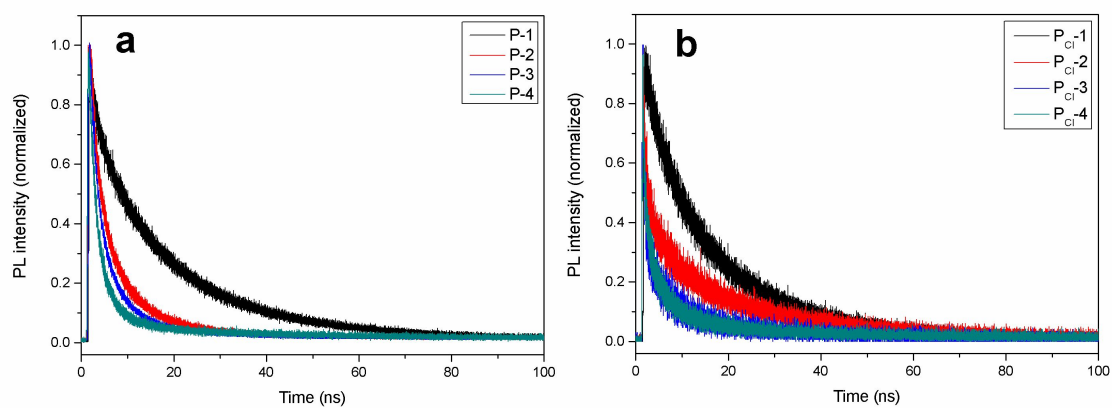

Figure S2. Time-resolved PL decay curves of (a)  $\text{CH}_3\text{NH}_3\text{PbI}_3$  and (b)  $\text{CH}_3\text{NH}_3\text{PbI}_{3-x}\text{Cl}_x$  films prepared under different humidity conditions.

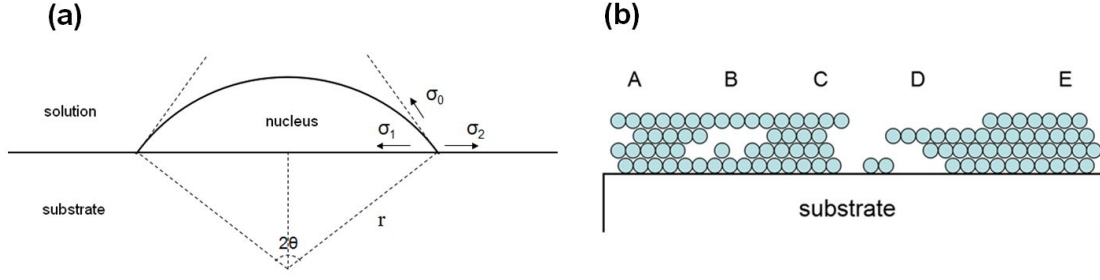

Figure S3. (a) Spherical cap nucleus formed on substrate surface; (b) The difference of supersaturation in different regions (A,C,E > B, D) results in destruction of crystal structure.<sup>3</sup>

Assuming that spherical cap nucleus is formed on substrate surface (Fig. S3a),<sup>1</sup> we define  $r$  as nucleation radius,  $\theta$  as contact angle of nucleus and substrate,  $\Delta G_v$  as volume free energy per unit,  $\sigma_0$  as nucleus surface tension,  $\sigma_1$  as nucleus and substrate interface tension,  $\sigma_2$  as substrate surface tension.

Under the equilibrium state,  $\sigma_0 \cos \theta = \sigma_2 - \sigma_1$

The change of surface and interface free energy can be expressed as follows:

$$\begin{aligned}\Delta G_s &= 2\pi r^2(1 - \cos \theta)\sigma_0 + \pi(r \sin \theta)^2(\sigma_1 - \sigma_2) \\ &= \pi r^2 \sigma_0 (2 - 3 \cos \theta + \cos^3 \theta)\end{aligned}$$

For the spherical cap nucleus, its volume  $V = \frac{\pi r^3(2 - 3 \cos \theta + \cos^3 \theta)}{3}$

So the change of volume free energy

$$\Delta G_v = V \cdot \Delta G_v = \frac{\pi r^3(2 - 3 \cos \theta + \cos^3 \theta)}{3} \Delta G_v$$

The change of total free energy

$$\Delta G = \Delta G_s + \Delta G_v = \pi \left( \frac{r^3}{3} \Delta G_v + r^2 \sigma_0 \right) (2 - 3 \cos \theta + \cos^3 \theta)$$

Set  $\frac{\partial(\Delta G)}{\partial r} = 0$ , we can conclude the critical nucleus radius:

$$r_0 = \frac{-2\sigma_0}{\Delta G_v} (\Delta G_v < 0)$$

If  $\Delta G_v$  is seen as the energy needed from equilibrium state to supersaturation, it can be

expressed as  $\Delta G_v = -Z(T) \cdot \ln\left(\frac{\rho_s}{\rho_e}\right) = -Z(T) \cdot \ln(\xi + 1)$ , in which  $Z(T)$  is a temperature

dependent coefficient.<sup>1</sup> So the **critical nucleus radius** can be expressed as

$$r_0 = \frac{2\sigma_0}{Z(T) \ln(\xi + 1)}.$$

The growth type of thin film also depends on the Young's relationship of the interface tensions:<sup>2</sup>

$$\text{Layer growth} \quad \sigma_2 \geq \sigma_0 + \sigma_1 + \frac{\Delta G_v}{C}$$

$$\text{Island growth} \quad \sigma_2 < \sigma_0 + \sigma_1 + \frac{\Delta G_v}{C}$$

C is a coefficient corresponded to crystal structure. So increased supersaturation is better for layer growth.

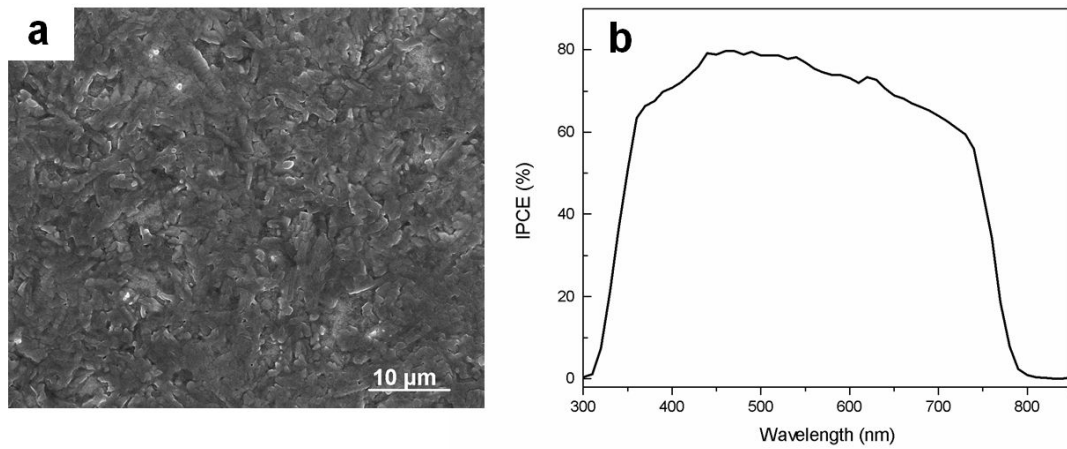

Figure S4. (a) SEM image of  $\text{CH}_3\text{NH}_3\text{PbI}_{3-x}\text{Cl}_x$  film spin-coated under RH~10% and annealed under RH~70%. (b) IPCE of the corresponding devices.

**Table S1:** Photovoltaic parameters measured under AM1.5 illumination of a batch of ten devices based on  $\text{CH}_3\text{NH}_3\text{PbI}_{3-x}\text{Cl}_x$  films spin-coated under RH~10% followed by annealing under RH~70%.

| Cell    | $V_{OC}$ (V)    | $J_{SC}$ (mA/cm <sup>2</sup> ) | $FF$            | $PCE$ (%)     |
|---------|-----------------|--------------------------------|-----------------|---------------|
| 1       | 0.89            | 19.1                           | 0.59            | 10.0          |
| 2       | 0.86            | 18.7                           | 0.57            | 9.2           |
| 3       | 0.89            | 19.6                           | 0.60            | 10.5          |
| 4       | 0.90            | 19.5                           | 0.54            | 9.4           |
| 5       | 0.88            | 18.5                           | 0.58            | 9.5           |
| 6       | 0.87            | 18.6                           | 0.60            | 9.7           |
| 7       | 0.89            | 18.9                           | 0.58            | 9.8           |
| 8       | 0.88            | 19.8                           | 0.59            | 10.3          |
| 9       | 0.89            | 19.5                           | 0.58            | 10.1          |
| 10      | 0.90            | 19.1                           | 0.57            | 9.8           |
| Average | $0.88 \pm 0.02$ | $19.1 \pm 0.6$                 | $0.58 \pm 0.03$ | $9.9 \pm 0.5$ |

## References

1. Venables, J. A. *Introduction to Surface and Thin Film Processes*, World Publish Corporation, Beijing, **2003**.
2. Aliofkhazraei, M.; Ali, N. *Two-Dimensional Nanostructure*, CRC Press (an imprint of Taylor & Francis Group), Boca Raton, **2012**
3. Zhang, K. C.; Zhang, L. H. *Crystal Growth (in Chinese)*, Science Press, Beijing, **1981**.
